# Supplementary material
Source: PubMed Central journal article supplement (PMC3754581)
Supplement: JB.00421-13_zjb999092718so1.pdf [file JB.00421-13_zjb999092718so1.pdf]

- Commensal
- Intestinal Pathogen
- APEC
- MNEC
- UPEC
- Environmental
- Animal Isolate

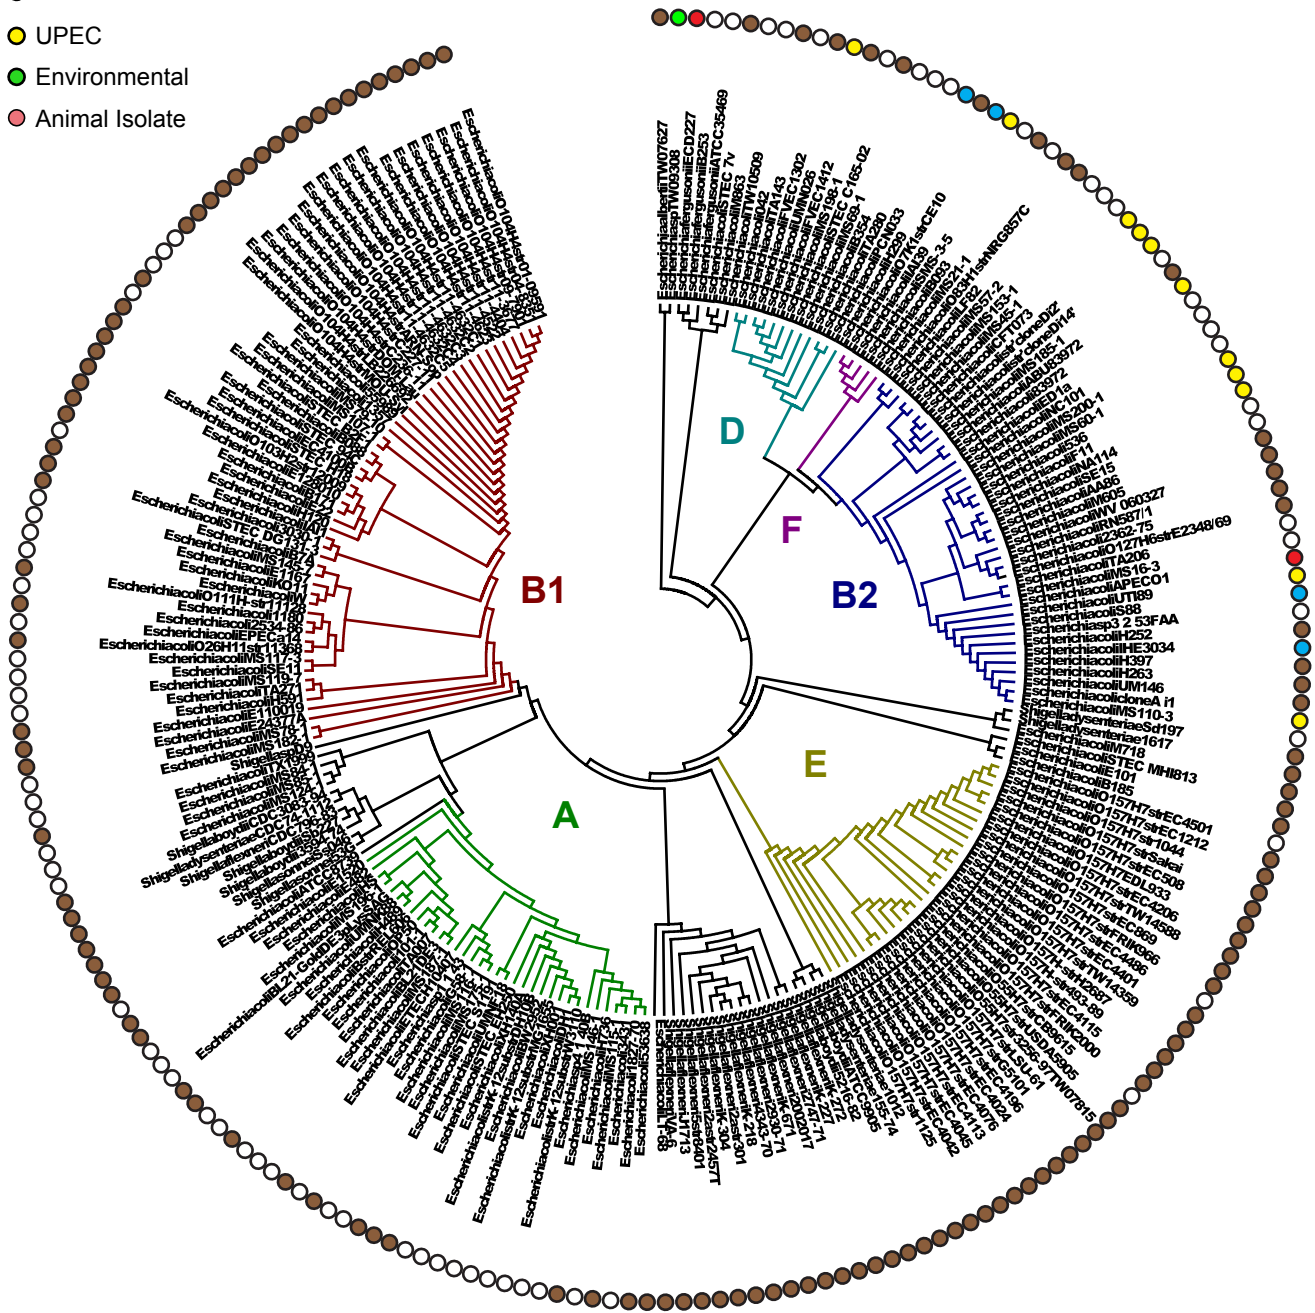

**Figure S1.** Phylogenetic tree of *Escherichia-Shigella*. A maximum-likelihood tree constructed from a concatenated alignment of *arcA*, *aroE*, *icd*, *mdh*, *mtlD*, *pgi*, and *rpoS* genes from 219 genomes. Branches are colored according to previously established phylogroups: A, B1, B2, D, E, and F.

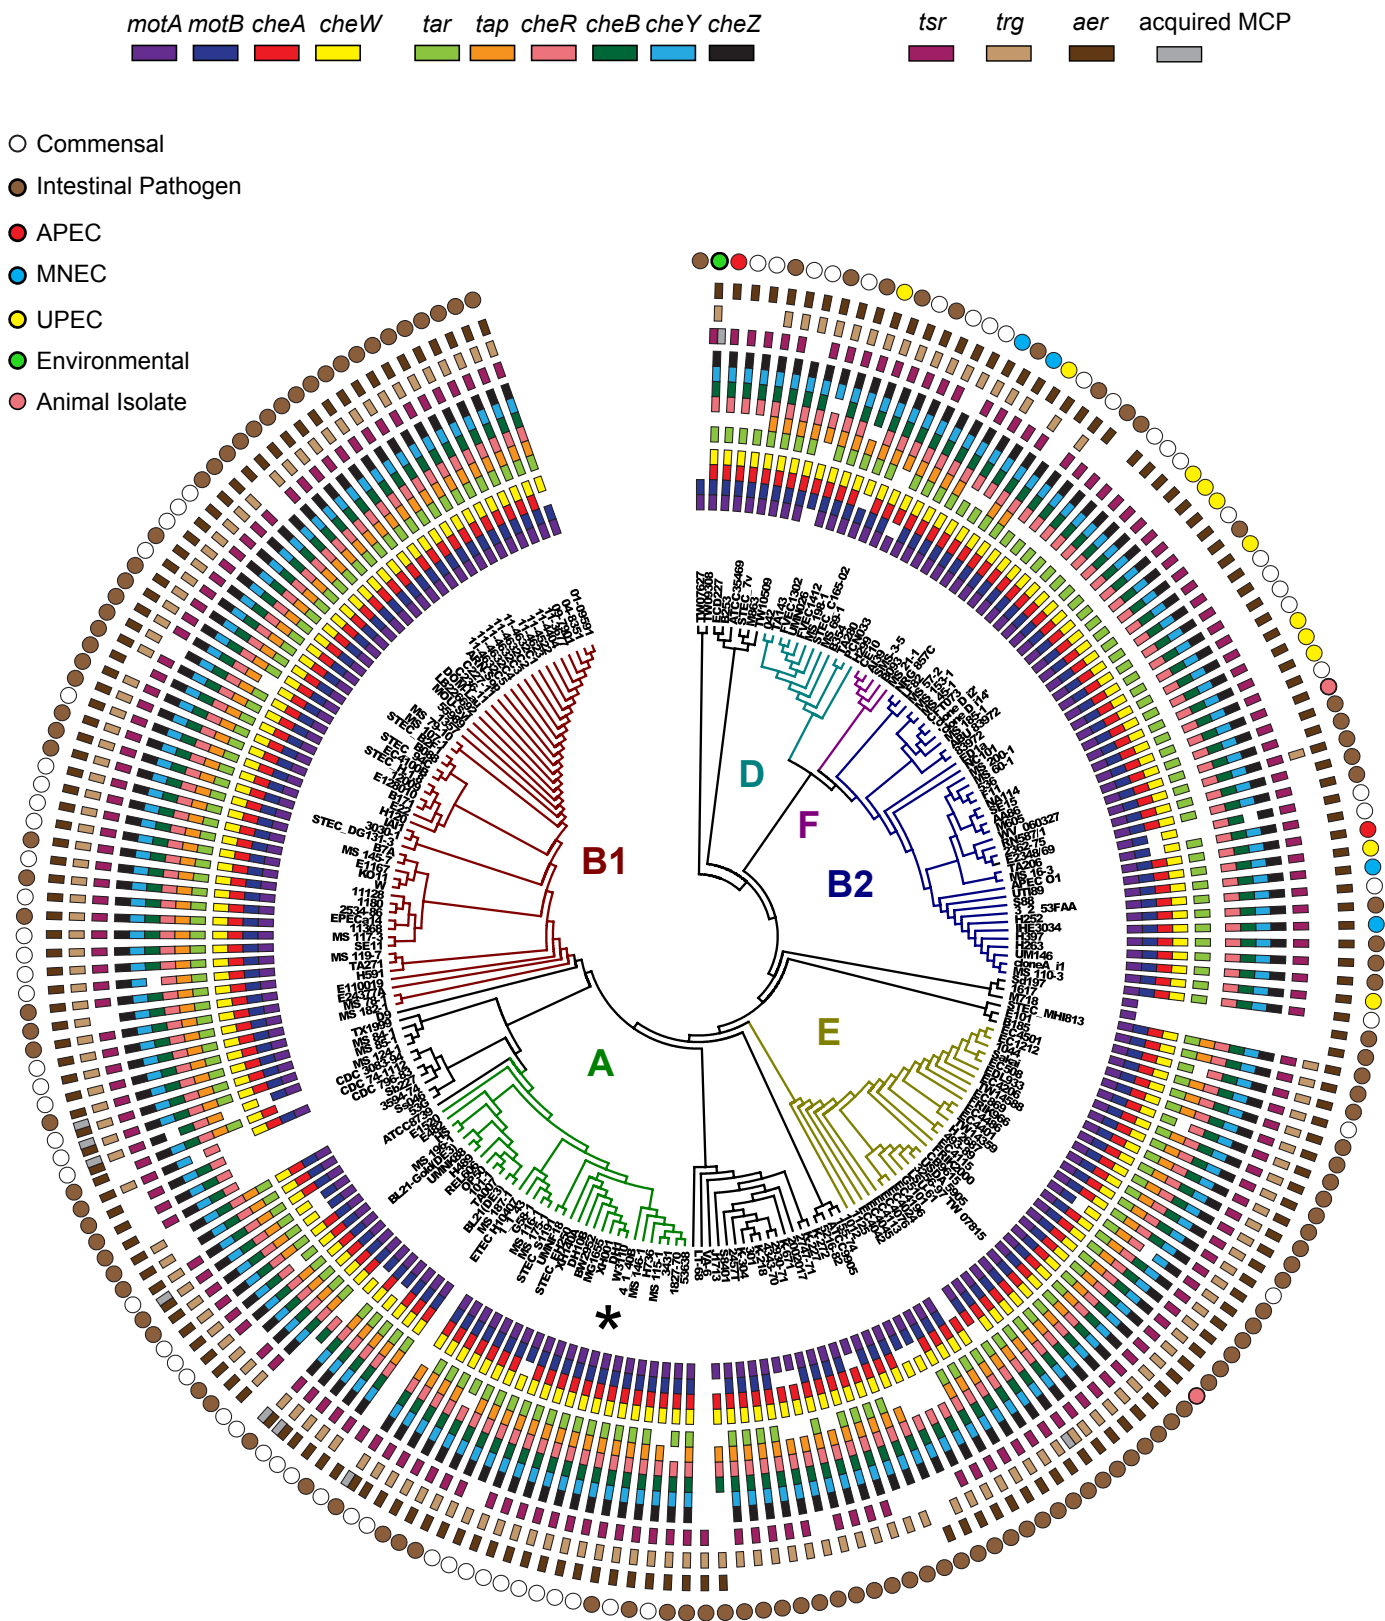

**Figure S2.** Presence of chemotaxis genes in *Escherichia/Shigella* genomes. Full strain names and properties are listed in Supplementary Table 1. Phylogenetic relationships are shown in the center (a complete phylogenetic tree is shown on Figure S1). Branches are colored according to previously established phylotypes. *E. coli* K12 W3110 strain (model for chemotaxis) is marked with an asterisk.

**Table S1. *E. coli* genomes used in molecular clock analysis.**

| <b>B2 group</b>                        | <b>A group</b>                            |
|----------------------------------------|-------------------------------------------|
| Escherichia coli O83:H1 str. NRG 857C  | Escherichia coli 53638                    |
| Escherichia coli MS 57-2               | Escherichia coli MS 115-1                 |
| Escherichia coli MS 153-1              | Escherichia coli H736                     |
| Escherichia coli MS 45-1               | Escherichia coli MS 146-1                 |
| Escherichia coli CFT073                | Escherichia sp. 4_1_40B                   |
| Escherichia coli str. 'clone D i2'     | Escherichia coli str. K-12 substr. W3110  |
| Escherichia coli str. 'clone D i14'    | Escherichia coli DH1                      |
| Escherichia coli MS 185-1              | Escherichia coli XH001                    |
| Escherichia coli ABU 83972             | Escherichia coli str. K-12 substr. MG1655 |
| Escherichia coli 83972                 | Escherichia coli BW2952                   |
| Escherichia coli ED1a                  | Escherichia coli XH140A                   |
| Escherichia coli NC101                 | Escherichia coli STEC_EH250               |
| Escherichia coli MS 200-1              | Escherichia coli UMNf18                   |
| Escherichia coli MS 60-1               | Escherichia coli STEC_S1191               |
| Escherichia coli 536                   | Escherichia coli MS 175-1                 |
| Escherichia coli F11                   | Escherichia coli MS 116-1                 |
| Escherichia coli NA114                 | Escherichia coli ETEC H10407              |
| Escherichia coli SE15                  | Escherichia coli MS 187-1                 |
| Escherichia coli AA86                  | Escherichia coli BL21(DE3)                |
| Escherichia coli M605                  | Escherichia coli 101-1                    |
| Escherichia coli WV_060327             | Escherichia coli B str. REL606            |
| Escherichia coli RN587/1               | Escherichia coli H489                     |
| Escherichia coli 2362-75               | Escherichia coli BL21-Gold(DE3)pLysS AG   |
| Escherichia coli O127:H6 str. E2348/69 | Escherichia coli MS 196-1                 |
| Escherichia coli APEC O1               | Escherichia coli HS                       |
| Escherichia coli UTI89                 | Escherichia coli ATCC 8739                |
| Escherichia coli S88                   |                                           |
| Escherichia coli H252                  |                                           |
| Escherichia coli IHE3034               |                                           |
| Escherichia coli H397                  |                                           |
| Escherichia coli UM146                 |                                           |
| Escherichia coli MS 110-3              |                                           |
